# Supplementary material
Source: bioRxiv or medRxiv preprint supplement (https://www.biorxiv.org/highwire/filestream/82957/field_highwire_adjunct_files/0/269910-1.pdf)
Supplement: Supplementary file [file 269910-1.pdf]

Supplementary Figures and Tables

**CRISPR-DT: designing gRNAs for the CRISPR-Cpf1 system with improved target efficiency and specificity**

Houxiang Zhu<sup>1</sup> and Chun Liang<sup>1,2\*</sup>

<sup>1</sup>Department of Biology, Miami University, Oxford, OH 45056, USA

<sup>2</sup>Department of Computer Science and Software Engineering, Miami University, Oxford, OH 45056, USA

\* Correspondence: [liangc@miamioh.edu](mailto:liangc@miamioh.edu)

HZ: [zhuh4@miamioh.edu](mailto:zhuh4@miamioh.edu)

CL: [liangc@miamioh.edu](mailto:liangc@miamioh.edu)

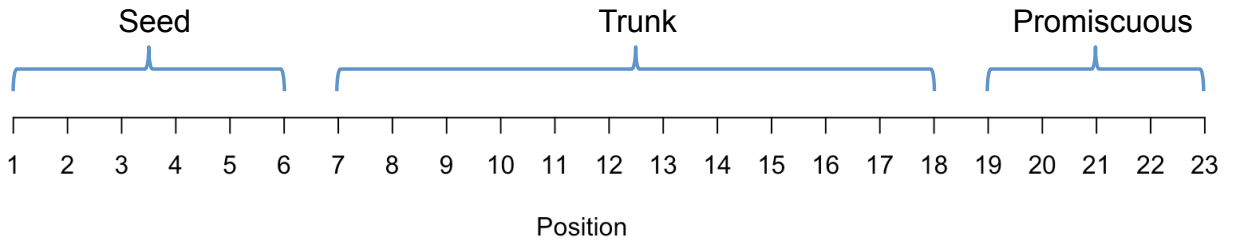

**Figure S1** Three different regions of the 23-nt gRNA sequence for the CRISPR-Cpf1 system.

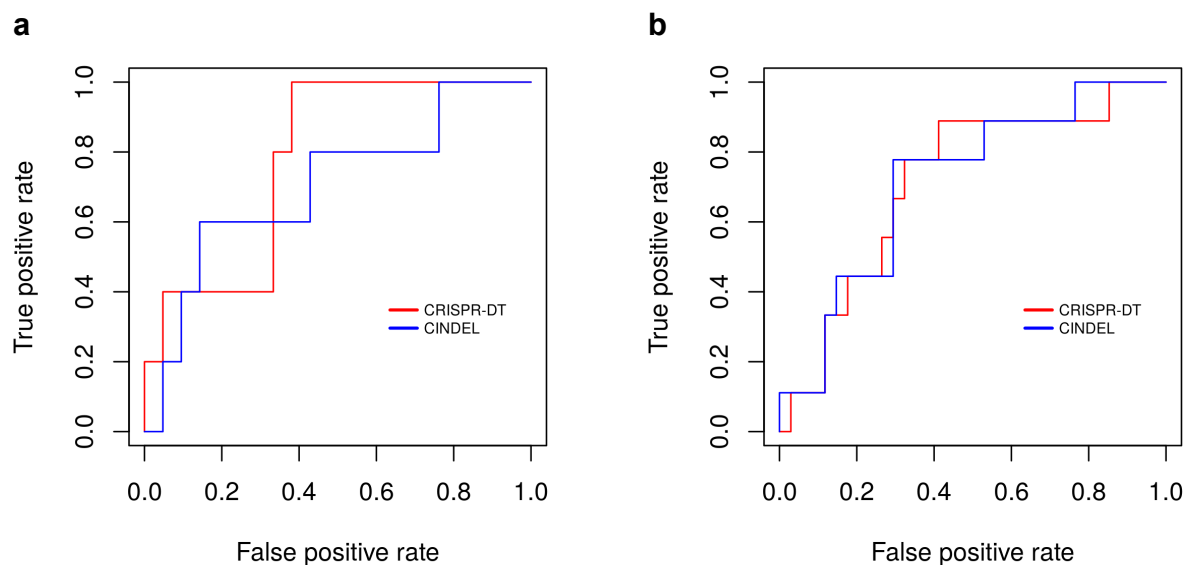

**Figure S2** Validation of our final SVM model using independent experimental data. **a** ROC curves comparing the performance of our model (CRISPR-DT) and the Kim et al. (2017) model (CINDEL) in predicting target efficiency using independent gRNAs with the TTTC PAM. **b** ROC curves comparing the performance of our model (CRISPR-DT) and the Kim et al. (2017) model (CINDEL) in predicting target efficiency using independent gRNAs with the TTTG PAM.

# CRISPR-DT: CRISPR DNA-Targeting Prediction and Visualization

Home  
Cpf1  
Cas9  
Cas9n  
RFN

## CRISPR-Cpf1 System

### Step 1: Provide a DNA sequence to target

Input a DNA sequence in FASTA format: [?](#) Example Sequence

### Step 2: Choose the reference genome

Reference genome:  [?](#)

### Step 3: Describe the PAM requirement

PAM sequence [?](#)

On target:  Off target:

### Step 4: Choose an off-target setting

Basic settings [\(show options\)](#)

Specific settings [\(show options\)](#)

[Advanced Options](#)

**Figure S3** The parameter setting page of the CRISPR-Cpf1 system. First, users input a DNA sequence in FASTA format into the text area. Second, users select a reference genome. Third, users set up the PAM requirement. Fourth, users choose an off-target setting (either “Basic settings” or “Specific settings”).

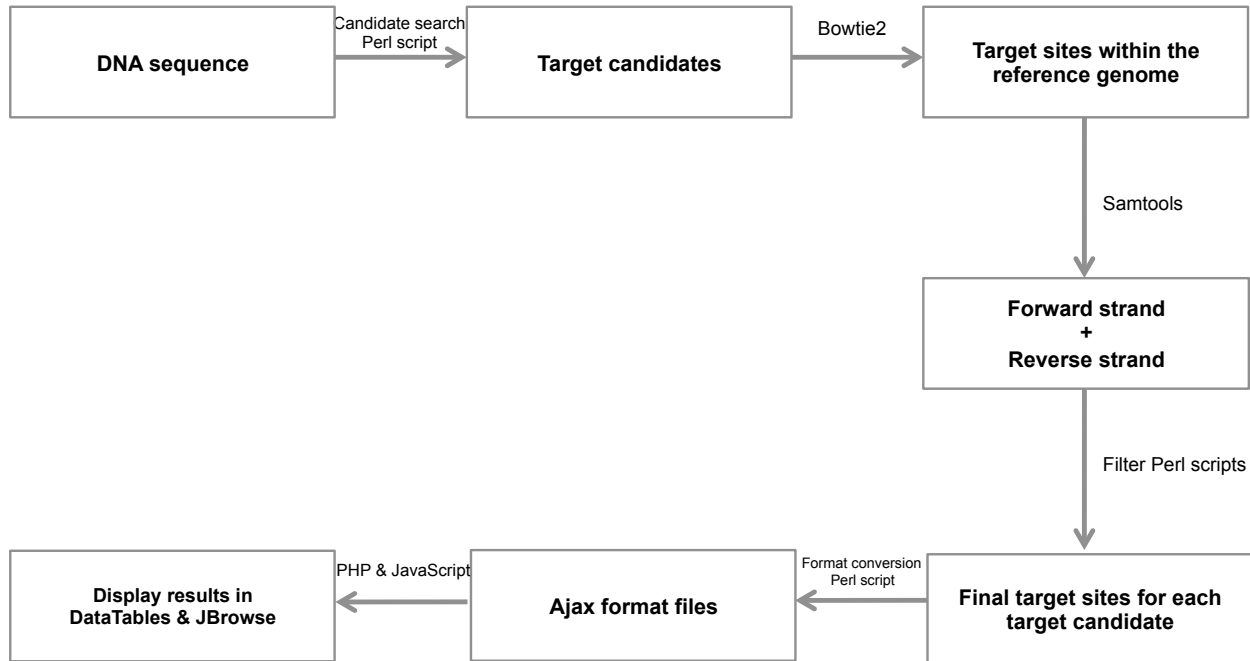

**Figure S4** The flowchart of CRISPR-DT backend pipeline. CRISPR-DT first processes user input DNA sequence and then displays results in the interfaces.

**Table S1** Significant position-specific dinucleotide probability within the 23-nt gRNA sequences

| Position-specific Dinucleotides | Efficient gRNAs | Inefficient gRNAs | Enrichment Ratio <sup>a</sup> | <i>P</i> -value <sup>b</sup> |
|---------------------------------|-----------------|-------------------|-------------------------------|------------------------------|
| Position_1_CC                   | 0.26            | 0.06              | 4.57                          | 1.12E-05                     |
| Position_1_UC                   | 0.01            | 0.16              | 0.05                          | 1.51E-05                     |
| Position_1_UU                   | 0.00            | 0.12              | 0.00                          | 7.08E-05                     |
| Position_19_GG                  | 0.04            | 0.18              | 0.22                          | 2.92E-04                     |
| Position_3_UG                   | 0.16            | 0.03              | 5.00                          | 5.78E-04                     |
| Position_5_CG                   | 0.02            | 0.13              | 0.13                          | 6.16E-04                     |
| Position_1_UG                   | 0.01            | 0.10              | 0.08                          | 9.91E-04                     |
| Position_8_AC                   | 0.14            | 0.03              | 4.50                          | 1.76E-03                     |
| Position_17_GC                  | 0.01            | 0.10              | 0.08                          | 1.77E-03                     |
| Position_3_GU                   | 0.02            | 0.13              | 0.19                          | 1.91E-03                     |
| Position_22_GG                  | 0.05            | 0.17              | 0.29                          | 2.20E-03                     |
| Position_13_UU                  | 0.00            | 0.07              | 0.00                          | 2.38E-03                     |
| Position_2_GG                   | 0.02            | 0.12              | 0.20                          | 3.33E-03                     |
| Position_6_AC                   | 0.16            | 0.05              | 3.33                          | 3.68E-03                     |
| Position_12_GG                  | 0.05            | 0.16              | 0.30                          | 3.68E-03                     |
| Position_1_GG                   | 0.17            | 0.06              | 3.00                          | 4.94E-03                     |
| Position_5_CA                   | 0.13            | 0.03              | 4.00                          | 5.15E-03                     |
| Position_18_GG                  | 0.02            | 0.11              | 0.21                          | 5.75E-03                     |
| Position_20_GC                  | 0.02            | 0.11              | 0.21                          | 5.75E-03                     |
| Position_4_UG                   | 0.05            | 0.15              | 0.32                          | 6.10E-03                     |
| Position_3_UA                   | 0.06            | 0.00              | N/A                           | 7.63E-03                     |
| Position_8_GG                   | 0.06            | 0.16              | 0.35                          | 8.04E-03                     |
| Position_18_CG                  | 0.02            | 0.10              | 0.23                          | 9.84E-03                     |
| Position_16_GG                  | 0.05            | 0.14              | 0.33                          | 9.98E-03                     |
| Position_22_CG                  | 0.05            | 0.14              | 0.33                          | 9.98E-03                     |
| Position_9_CU                   | 0.07            | 0.01              | 9.00                          | 1.00E-02                     |
| Position_21_UA                  | 0.07            | 0.01              | 9.00                          | 1.00E-02                     |
| Position_13_UA                  | 0.09            | 0.02              | 5.50                          | 1.05E-02                     |
| Position_15_GU                  | 0.02            | 0.09              | 0.18                          | 1.05E-02                     |
| Position_22_UC                  | 0.15            | 0.06              | 2.71                          | 1.29E-02                     |
| Position_8_AA                   | 0.05            | 0.00              | N/A                           | 1.37E-02                     |
| Position_6_GU                   | 0.03            | 0.11              | 0.29                          | 1.45E-02                     |
| Position_1_GA                   | 0.10            | 0.02              | 4.00                          | 1.67E-02                     |
| Position_16_CC                  | 0.10            | 0.02              | 4.00                          | 1.67E-02                     |
| Position_21_CG                  | 0.02            | 0.10              | 0.25                          | 1.67E-02                     |
| Position_11_AA                  | 0.06            | 0.01              | 8.00                          | 1.78E-02                     |
| Position_7_UG                   | 0.03            | 0.10              | 0.31                          | 2.40E-02                     |
| Position_21_CC                  | 0.03            | 0.10              | 0.31                          | 2.40E-02                     |
| Position_8_UG                   | 0.05            | 0.13              | 0.38                          | 2.57E-02                     |
| Position_20_GG                  | 0.05            | 0.13              | 0.38                          | 2.57E-02                     |

|                |      |      |      |          |
|----------------|------|------|------|----------|
| Position_1_GU  | 0.09 | 0.02 | 3.67 | 2.81E-02 |
| Position_7_CC  | 0.09 | 0.02 | 3.67 | 2.81E-02 |
| Position_17_UU | 0.09 | 0.02 | 3.67 | 2.81E-02 |
| Position_4_UA  | 0.07 | 0.02 | 4.50 | 3.13E-02 |
| Position_6_UA  | 0.07 | 0.02 | 4.50 | 3.13E-02 |
| Position_7_CA  | 0.07 | 0.02 | 4.50 | 3.13E-02 |
| Position_2_UG  | 0.01 | 0.06 | 0.14 | 3.17E-02 |
| Position_3_AA  | 0.01 | 0.06 | 0.14 | 3.17E-02 |
| Position_16_UU | 0.01 | 0.06 | 0.14 | 3.17E-02 |
| Position_9_GC  | 0.04 | 0.11 | 0.36 | 3.20E-02 |
| Position_14_GU | 0.06 | 0.14 | 0.41 | 3.20E-02 |
| Position_22_AC | 0.17 | 0.08 | 2.10 | 3.50E-02 |
| Position_10_CG | 0.03 | 0.10 | 0.33 | 3.91E-02 |
| Position_11_GG | 0.05 | 0.12 | 0.40 | 4.05E-02 |
| Position_18_AU | 0.03 | 0.00 | N/A  | 4.51E-02 |
| Position_1_AG  | 0.02 | 0.08 | 0.30 | 4.67E-02 |
| Position_12_AG | 0.08 | 0.02 | 3.33 | 4.67E-02 |
| Position_12_UU | 0.02 | 0.08 | 0.30 | 4.67E-02 |

<sup>a</sup>The enrichment ratio was calculated through dividing the average dinucleotide probability of efficient gRNAs by that of inefficient gRNAs.

<sup>b</sup>The *P*-value was determined by Welch's t-test ( $P < 0.05$ ).

**Table S2** Significant position-nonspecific trinucleotide and tetranucleotide counts within the 23-nt gRNA sequences

| Tri- and Tetranucleotides | Efficient gRNAs | Inefficient gRNAs | Enrichment Ratio <sup>a</sup> | <i>P</i> -value <sup>b</sup> |
|---------------------------|-----------------|-------------------|-------------------------------|------------------------------|
| Count_UGG                 | 0.32            | 0.75              | 0.43                          | 1.83E-05                     |
| Count_CCU                 | 0.58            | 0.27              | 2.15                          | 1.10E-04                     |
| Count_CCA                 | 0.63            | 0.31              | 2.03                          | 8.88E-04                     |
| Count_UAU                 | 0.19            | 0.05              | 4.00                          | 1.08E-03                     |
| Count_GCG                 | 0.10            | 0.34              | 0.30                          | 1.33E-03                     |
| Count_ACC                 | 0.70            | 0.40              | 1.76                          | 1.46E-03                     |
| Count_CUC                 | 0.57            | 0.32              | 1.78                          | 1.64E-03                     |
| Count_CCG                 | 0.25            | 0.49              | 0.51                          | 1.71E-03                     |
| Count_GUG                 | 0.35            | 0.64              | 0.55                          | 2.16E-03                     |
| Count_UAC                 | 0.40            | 0.19              | 2.08                          | 2.83E-03                     |
| Count_CGG                 | 0.27            | 0.53              | 0.52                          | 4.61E-03                     |
| Count_GGC                 | 0.22            | 0.47              | 0.47                          | 6.28E-03                     |
| Count_GGU                 | 0.46            | 0.74              | 0.62                          | 6.54E-03                     |
| Count_AUA                 | 0.14            | 0.03              | 4.25                          | 7.07E-03                     |
| Count_GGG                 | 0.27            | 0.48              | 0.57                          | 8.09E-03                     |
| Count_CGU                 | 0.26            | 0.46              | 0.56                          | 1.38E-02                     |
| Count_AAC                 | 0.38            | 0.22              | 1.78                          | 1.49E-02                     |
| Count_GUU                 | 0.24            | 0.40              | 0.60                          | 1.71E-02                     |
| Count_UAA                 | 0.18            | 0.07              | 2.56                          | 1.95E-02                     |
| Count_GAA                 | 0.33            | 0.18              | 1.86                          | 2.24E-02                     |
| Count_GUA                 | 0.41            | 0.25              | 1.65                          | 2.64E-02                     |
| Count_CAU                 | 0.30            | 0.17              | 1.76                          | 2.73E-02                     |
| Count_UUU                 | 0.08            | 0.18              | 0.43                          | 3.20E-02                     |
| Count_AGA                 | 0.34            | 0.21              | 1.65                          | 3.37E-02                     |
| Count_CUA                 | 0.27            | 0.16              | 1.70                          | 3.57E-02                     |
| Count_UCG                 | 0.32            | 0.48              | 0.67                          | 4.36E-02                     |
| Count_CCCA                | 0.17            | 0.02              | 7.00                          | 3.84E-04                     |
| Count_GGGG                | 0.05            | 0.22              | 0.21                          | 4.48E-04                     |
| Count_GUGG                | 0.10            | 0.29              | 0.36                          | 8.01E-04                     |
| Count_GCCG                | 0.01            | 0.09              | 0.09                          | 3.17E-03                     |
| Count_CGUU                | 0.02            | 0.12              | 0.20                          | 3.33E-03                     |
| Count_ACAU                | 0.10            | 0.02              | 6.50                          | 3.43E-03                     |
| Count_UGGG                | 0.07            | 0.22              | 0.33                          | 3.84E-03                     |
| Count_CUGG                | 0.06            | 0.18              | 0.35                          | 3.94E-03                     |
| Count_CCUU                | 0.16            | 0.05              | 3.33                          | 5.36E-03                     |
| Count_AAGA                | 0.10            | 0.02              | 6.00                          | 6.02E-03                     |
| Count_AGCG                | 0.02            | 0.10              | 0.17                          | 6.02E-03                     |
| Count_GGUG                | 0.11            | 0.26              | 0.42                          | 7.25E-03                     |



|            |      |      |      |          |
|------------|------|------|------|----------|
| Count_UUCG | 0.04 | 0.14 | 0.29 | 7.38E-03 |
| Count_CCAA | 0.12 | 0.02 | 5.00 | 8.36E-03 |
| Count_ACCA | 0.20 | 0.07 | 2.78 | 8.84E-03 |
| Count_GACC | 0.21 | 0.09 | 2.36 | 9.53E-03 |
| Count_UGGC | 0.02 | 0.10 | 0.23 | 9.84E-03 |
| Count_GCUU | 0.02 | 0.10 | 0.23 | 9.84E-03 |
| Count_GUAU | 0.07 | 0.01 | 9.00 | 1.00E-02 |
| Count_AGAA | 0.09 | 0.02 | 5.50 | 1.05E-02 |
| Count_CCCU | 0.14 | 0.04 | 3.60 | 1.23E-02 |
| Count_CCUC | 0.22 | 0.10 | 2.15 | 1.27E-02 |
| Count_CUAU | 0.05 | 0.00 | N/A  | 1.37E-02 |
| Count_CCGG | 0.06 | 0.17 | 0.33 | 1.47E-02 |
| Count_CCCG | 0.05 | 0.15 | 0.32 | 1.50E-02 |
| Count_AGGU | 0.08 | 0.19 | 0.42 | 1.54E-02 |
| Count_CCAU | 0.10 | 0.02 | 4.33 | 1.54E-02 |
| Count_GUAA | 0.08 | 0.02 | 5.00 | 1.82E-02 |
| Count_ACUC | 0.16 | 0.06 | 2.50 | 2.07E-02 |
| Count_AGUU | 0.03 | 0.10 | 0.31 | 2.40E-02 |
| Count_GGGC | 0.06 | 0.17 | 0.38 | 2.52E-02 |
| Count_GAGC | 0.06 | 0.14 | 0.39 | 2.64E-02 |
| Count_GGAA | 0.09 | 0.02 | 3.67 | 2.81E-02 |
| Count_UCGG | 0.06 | 0.14 | 0.41 | 3.20E-02 |
| Count_UGGU | 0.10 | 0.22 | 0.48 | 3.42E-02 |
| Count_GCGG | 0.02 | 0.11 | 0.21 | 3.79E-02 |
| Count_ACUU | 0.10 | 0.03 | 3.00 | 3.91E-02 |
| Count_UACA | 0.09 | 0.02 | 3.67 | 4.08E-02 |
| Count_UCCG | 0.04 | 0.11 | 0.36 | 4.21E-02 |
| Count_CGGG | 0.07 | 0.16 | 0.45 | 4.37E-02 |
| Count_AUAU | 0.03 | 0.00 | N/A  | 4.51E-02 |
| Count_UAAA | 0.03 | 0.00 | N/A  | 4.51E-02 |
| Count_UAUA | 0.03 | 0.00 | N/A  | 4.51E-02 |
| Count_UAAC | 0.08 | 0.02 | 3.33 | 4.67E-02 |
| Count_CUCC | 0.13 | 0.06 | 2.29 | 4.93E-02 |

<sup>a</sup> The enrichment ratio was calculated through dividing the average nucleotide counts of efficient gRNAs by that of inefficient gRNAs.

<sup>b</sup> The *P*-value was determined by Welch's t-test ( $P < 0.05$ ).

**Table S3** The 48 most important features used to build the final SVM model.

| Feature Name        | Feature Type | Mean Gini |
|---------------------|--------------|-----------|
| Position_1_U        | Binary       | 4.58      |
| Minimum_Free_Energy | Numerical    | 3.90      |
| Count_G             | Numerical    | 2.45      |
| MT_Promiscuous      | Numerical    | 2.43      |
| MT_Entire           | Numerical    | 2.40      |
| Count_A             | Numerical    | 1.79      |
| Position_1_G        | Binary       | 1.32      |
| Count_C             | Numerical    | 1.28      |
| MT_Trunk            | Numerical    | 1.17      |
| Count_GG            | Numerical    | 1.03      |
| Position_23_C       | Binary       | 1.00      |
| Position_1_UC       | Binary       | 0.98      |
| Position_1_CC       | Binary       | 0.97      |
| Count_CG            | Numerical    | 0.95      |
| GC_Entire           | Numerical    | 0.81      |
| MT_Seed             | Numerical    | 0.80      |
| Count_CU            | Numerical    | 0.79      |
| Position_1_UU       | Binary       | 0.68      |
| Count_AC            | Numerical    | 0.67      |
| GC_Promiscuous      | Numerical    | 0.65      |
| Position_1_C        | Binary       | 0.65      |
| Count_CC            | Numerical    | 0.64      |
| Count_UGG           | Numerical    | 0.64      |
| Position_23_G       | Binary       | 0.64      |
| Count_CCU           | Numerical    | 0.62      |
| Count_U             | Numerical    | 0.61      |
| Position_19_G       | Binary       | 0.55      |
| Count_UA            | Numerical    | 0.53      |
| Count_GC            | Numerical    | 0.53      |
| Count_CCA           | Numerical    | 0.52      |
| GC_Trunk            | Numerical    | 0.52      |
| Count_GU            | Numerical    | 0.52      |
| Count_GA            | Numerical    | 0.49      |
| Position_3_UG       | Binary       | 0.49      |
| Count_AG            | Numerical    | 0.49      |
| GC_Seed             | Numerical    | 0.49      |
| Position_3_U        | Binary       | 0.48      |
| Position_9_G        | Binary       | 0.48      |
| Position_1_GG       | Binary       | 0.46      |
| Count_CCG           | Numerical    | 0.45      |

|               |           |      |
|---------------|-----------|------|
| Count_UU      | Numerical | 0.45 |
| Count_CA      | Numerical | 0.44 |
| Count_CUC     | Numerical | 0.43 |
| Position_3_GU | Binary    | 0.42 |
| Count_AU      | Numerical | 0.42 |
| Count_GCG     | Numerical | 0.42 |
| Count_ACC     | Numerical | 0.42 |
| Count_CGG     | Numerical | 0.40 |

---
